# Supplementary material
Source: PubMed Central journal article supplement (PMC8416744)
Supplement: NIHMS1698821-supplement-supplement.pdf [file NIHMS1698821-supplement-supplement.pdf]

Supplemental Table 1. Grandchild Caregiving on Word Recall (delayed and immediate, standardized), only

|                                                      | Model 1          |                 |
|------------------------------------------------------|------------------|-----------------|
|                                                      | All Grandparents |                 |
|                                                      | B                | 95% CI          |
| Intercept                                            | 0.14             | (-0.14, 0.42)   |
| <i>Grandchild caregiving</i>                         |                  |                 |
| Cares for grandchildren                              | 0.20***          | (0.14, 0.27)    |
| <b>Controls</b>                                      |                  |                 |
| <i>Health Conditions</i>                             |                  |                 |
| Self-rated health                                    | 0.20***          | (0.16, 0.25)    |
| Has at least one ADL limitation                      | -0.27***         | (-0.38, -0.16)  |
| Depressive symptoms                                  | -0.03***         | (-0.05, -0.01)  |
| Comorbidities                                        | 0.04             | (-0.01, 0.08)   |
| Missing                                              | 0.01             | (-0.09, 0.10)   |
| <i>Family Characteristics</i>                        |                  |                 |
| Number of children                                   | 0.02*            | (-0.0002, 0.03) |
| Number of children who have died                     | -0.04*           | (-0.08, -0.01)  |
| Number of grandchildren under age 16                 | 0.01             | (-0.04, 0.02)   |
| Doesn't know how many grandchildren under age 16     | 0.15**           | (0.05, 0.26)    |
| <i>Demographics</i>                                  |                  |                 |
| Female                                               | 0.04             | (-0.03, -0.11)  |
| Age                                                  | -0.01***         | (-0.02, -0.01)  |
| Marital status (Ref: Married or living with partner) |                  |                 |
| Never married                                        | 0.04             | (-0.15, 0.23)   |
| Separated or divorced                                | -0.05            | (-0.15, 0.05)   |
| Widowed                                              | -0.10**          | (-0.18, -0.03)  |
| <i>Socioeconomic Indicators</i>                      |                  |                 |
| Education (Ref: No formal)                           |                  |                 |
| Primary                                              | 0.21***          | (0.14, 0.28)    |
| Secondary                                            | 0.52***          | (0.42, 0.62)    |
| Employment status (Ref: Not working)                 |                  |                 |
| Employed                                             | -0.01            | (-0.12, 0.09)   |
| Home manager                                         | -0.06            | (-0.16, 0.03)   |
| Retired                                              | -0.10*           | (-0.18, -0.02)  |
| Individual earnings and transfers                    | -0.05*           | (-0.09, -0.01)  |
| <i>Household and Caregiving Characteristics</i>      |                  |                 |
| Household wealth index                               | 0.04***          | (0.02, 0.06)    |
| Provides care to adult in household                  | -0.15*           | (-0.30, -0.001) |
| Number of people in household                        | -0.03            | (-0.07, 0.01)   |
| Interview month                                      | 0.03***          | (0.02, 0.04)    |
| $R^2$                                                | 0.23             |                 |
| $F$                                                  | 43.01***         |                 |
| $N$                                                  | 3,668            |                 |

two-tailed tests, + p<.10 , \* p<.05, \*\*P<.01, \*\*\* p<.001

Supplemental Table 2. OLS Models Predicting Cognitive Function Z-Score with Grandchild Caregiving – Half of the Year vs. Less Intensive

|                                                      | Model 1    |                | Model 2    |                |
|------------------------------------------------------|------------|----------------|------------|----------------|
|                                                      | B          | 95% CI         | B          | 95% CI         |
| Intercept                                            | 0.50***    | (0.21, 0.80)   | 0.56***    | (0.28, 0.83)   |
| <i>Grandchild caregiving</i>                         |            |                |            |                |
| Does not care for grandchildren                      | -0.18**    | (-0.30, -0.05) | -0.23***   | (-0.30,-0.16)  |
| Cares for grandchildren less than half of the year   | <b>REF</b> |                | -0.05      | (-0.19, 0.08)  |
| Cares for grandchildren at least half of the year    | -0.05      | (-0.08, 0.19)  | <b>REF</b> |                |
| <b>Controls</b>                                      |            |                |            |                |
| <i>Health Conditions</i>                             |            |                |            |                |
| Self-rated health                                    | 0.18***    | (0.14, 0.23)   | 0.18***    | (0.14, 0.23)   |
| Has at least one ADL limitation                      | -0.29***   | (-0.39, -0.18) | -0.29***   | (-0.39, -0.18) |
| Depressive symptoms                                  | -0.03***   | (-0.05, -0.02) | -0.03***   | (-0.05, -0.02) |
| Comorbidities                                        | 0.05*      | (0.01, 0.09)   | 0.05*      | (0.01, 0.09)   |
| Missing                                              | -0.01      | (-0.10, 0.09)  | -0.01      | (-0.10, 0.09)  |
| <i>Family Characteristics</i>                        |            |                |            |                |
| Number of children                                   | 0.03**     | (0.01, 0.04)   | 0.03**     | (0.01, 0.04)   |
| Number of children who have died                     | -0.05**    | (-0.09, -0.01) | -0.05**    | (-0.09, -0.01) |
| Number of grandchildren under age 16                 | 0.01       | (-0.003, 0.02) | 0.01       | (-0.003, 0.02) |
| Doesn't know how many grandchildren under age 16     | 0.15**     | (0.05, 0.25)   | 0.15**     | (0.05, 0.25)   |
| <i>Demographics</i>                                  |            |                |            |                |
| Female                                               | -0.07*     | (-0.14, -0.01) | -0.07*     | (-0.14, -0.01) |
| Age                                                  | -0.02***   | (-0.02, -0.01) | -0.02***   | (-0.02, -0.01) |
| Marital status (Ref: Married or living with partner) |            |                |            |                |
| Never married                                        | 0.06       | (-0.12, 0.24)  | 0.06       | (-0.12, 0.24)  |
| Separated or divorced                                | -0.04      | (-0.14, 0.05)  | -0.04      | (-0.14, 0.05)  |
| Widowed                                              | -0.14***   | (-0.21, -0.07) | -0.14***   | (-0.21, -0.07) |
| <i>Socioeconomic Indicators</i>                      |            |                |            |                |
| Education (Ref: No formal)                           |            |                |            |                |
| Primary                                              | 0.37***    | (0.30, 0.43)   | 0.37***    | (0.30, 0.43)   |
| Secondary                                            | 0.63***    | (0.53, 0.72)   | 0.63***    | (0.53, 0.72)   |
| Employment status (Ref: Not working)                 |            |                |            |                |
| Employed                                             | -0.02      | (-0.12, 0.07)  | -0.02      | (-0.12, 0.07)  |
| Home manager                                         | -0.10*     | (-0.20, -0.01) | -0.10*     | (-0.20, -0.01) |
| Retired                                              | -0.08*     | (-0.15, 0.003) | -0.08*     | (-0.15, 0.003) |
| Individual earnings and transfers                    | -0.03      | (-0.07, 0.01)  | -0.03      | (-0.07, 0.01)  |
| <i>Household and Caregiving Characteristics</i>      |            |                |            |                |
| Household wealth index                               | 0.05***    | (0.03, 0.07)   | 0.05***    | (0.03, 0.07)   |
| Provides care to adult in household                  | -0.08      | (-0.23, 0.06)  | -0.08      | (-0.23, 0.06)  |
| Number of people in household                        | -0.03+     | (-0.07, 0.003) | -0.03+     | (-0.07, 0.003) |
| Interview month                                      | 0.02***    | (0.01, 0.03)   | 0.02***    | (0.01, 0.03)   |
| $R^2$                                                | 0.31       |                | 0.31       |                |
| $F$                                                  | 61.51***   |                | 61.51***   |                |
| $N$                                                  | 3,649      |                | 3,649      |                |

two-tailed tests, + p<.10, \* p<.05, \*\*P<.01, \*\*\* p<.001  
N=3,649; 19 missing on variable indicating weeks of care; 23% of grandparents provided care for at least three-quarters of the year, and 6% for less than three-quarters

Supplemental Table 3. OLS Models Predicting Cognitive Function Z-Score with Grandchild Caregiving – Three-quarters of the Year vs. Less Intensive

|                                                      | Model 1  |                 | Model 2             |                 |
|------------------------------------------------------|----------|-----------------|---------------------|-----------------|
|                                                      | B        | 95% CI          | B                   | 95% CI          |
| Intercept                                            | 0.49***  | (0.20, 0.78)    | 0.56***             | (0.29, 0.84)    |
| <i>Grandchild caregiving</i>                         |          |                 |                     |                 |
| Does not care for grandchildren                      | -0.16**  | (-0.28, -0.05)  | -0.24***            | (-0.30,-0.17)   |
| Cares for grandchildren less than ¾ of the year      |          | <b>REF</b>      | -0.07               | (-0.20, 0.05)   |
| Cares for grandchildren at least ¾ of the year       | -0.07    | (-0.05, 0.20)   |                     | <b>REF</b>      |
| <b>Controls</b>                                      |          |                 |                     |                 |
| <i>Health Conditions</i>                             |          |                 |                     |                 |
| Self-rated health                                    | 0.18***  | (0.14, 0.23)    | 0.18***             | (0.14, 0.23)    |
| Has at least one ADL limitation                      | -0.29*** | (-0.39, -0.18)  | -0.29***            | (-0.39, -0.18)  |
| Depressive symptoms                                  | -0.03*** | (-0.05, -0.02)  | -0.03***            | (-0.05, -0.02)  |
| Comorbidities                                        | 0.05*    | (0.01, 0.09)    | 0.05*               | (0.01, 0.09)    |
| Missing                                              | -0.01+   | (-0.10, 0.09)   | -0.01 <sup>04</sup> | (-0.10, 0.09)   |
| <i>Family Characteristics</i>                        |          |                 |                     |                 |
| Number of children                                   | 0.03**   | (0.01, 0.04)    | 0.03**              | (0.01, 0.04)    |
| Number of children who have died                     | -0.05**  | (-0.09, -0.01)  | -0.05**             | (-0.09, -0.01)  |
| Number of grandchildren under age 16                 | 0.01     | (-0.003, 0.02)  | 0.01                | (-0.003, 0.02)  |
| Doesn't know how many grandchildren under age 16     | 0.15**   | (0.05, 0.25)    | 0.15**              | (0.05, 0.25)    |
| <i>Demographics</i>                                  |          |                 |                     |                 |
| Female                                               | -0.07*   | (-0.14, -0.01)  | -0.07*              | (-0.14, -0.01)  |
| Age                                                  | -0.02*** | (-0.02, -0.01)  | -0.02***            | (-0.02, -0.01)  |
| Marital status (Ref: Married or living with partner) |          |                 |                     |                 |
| Never married                                        | 0.06     | (-0.12, 0.24)   | 0.06                | (-0.12, 0.24)   |
| Separated or divorced                                | -0.04    | (-0.14, 0.05)   | -0.04               | (-0.14, 0.05)   |
| Widowed                                              | -0.14*** | (-0.21, -0.07)  | -0.14***            | (-0.21, -0.07)  |
| <i>Socioeconomic Indicators</i>                      |          |                 |                     |                 |
| Education (Ref: No formal)                           |          |                 |                     |                 |
| Primary                                              | 0.37***  | (0.30, 0.43)    | 0.37***             | (0.30, 0.43)    |
| Secondary                                            | 0.63***  | (0.53, 0.72)    | 0.63***             | (0.53, 0.72)    |
| Employment status (Ref: Not working)                 |          |                 |                     |                 |
| Employed                                             | -0.02    | (-0.12, 0.07)   | -0.02               | (-0.12, 0.07)   |
| Home manager                                         | -0.10*   | (-0.20, -0.01)  | -0.10*              | (-0.19, -0.01)  |
| Retired                                              | -0.08*   | (-0.15, -0.003) | -0.08*              | (-0.15, -0.003) |
| Individual earnings and transfers                    | -0.03    | (-0.07, 0.01)   | -0.03               | (-0.07, 0.01)   |
| <i>Household and Caregiving Characteristics</i>      |          |                 |                     |                 |
| Household wealth index                               | 0.05***  | (0.03, 0.07)    | 0.05***             | (0.03, 0.07)    |
| Provides care to adult in household                  | -0.08    | (-0.23, 0.06)   | -0.09               | (-0.23, 0.06)   |
| Number of people in household                        | -0.03+   | (-0.07, 0.002)  | -0.03+              | (-0.07, 0.004)  |
| Interview month                                      | 0.02***  | (0.01, 0.03)    | 0.02***             | (0.01, 0.03)    |
| $R^2$                                                |          | 0.31            |                     | 0.31            |
| $F$                                                  |          | 61.55***        |                     | 61.55***        |
| $N$                                                  |          | 3,649           |                     | 3,649           |

two-tailed tests, + p<.10 , \* p<.05, \*\*P<.01, \*\*\* p<.001  
N=3,649; 19 missing on variable indicating weeks of care

Supplemental Table 4. OLS Models Predicting Cognitive Function Z-Score with Grandchild Caregiving – Sensitivity to Age

|                                                      | Model 1  |                |
|------------------------------------------------------|----------|----------------|
|                                                      | B        | 95% CI         |
| Intercept                                            | 0.51**   | (0.20, 0.83)   |
| <i>Grandchild caregiving</i>                         |          |                |
| Cares for grandchildren                              | 0.24***  | (0.15, 0.32)   |
| X Aged 65+                                           | -0.05    | (-0.17, 0.07)  |
| Aged 65+                                             | -0.212*  | (-0.29, 0.02)  |
| <b>Controls</b>                                      |          |                |
| <i>Health Conditions</i>                             |          |                |
| Self-rated health                                    | 0.18***  | (0.14, 0.23)   |
| Has at least one ADL limitation                      | -0.29*** | (-0.39, -0.18) |
| Depressive symptoms                                  | -0.03*** | (-0.05, -0.01) |
| Comorbidities                                        | 0.05*    | (0.01, 0.09)   |
| Missing                                              | -0.01    | (-0.10, 0.09)  |
| <i>Family Characteristics</i>                        |          |                |
| Number of children                                   | 0.03**   | (0.01, 0.04)   |
| Number of children who have died                     | -0.05**  | (-0.09, -0.02) |
| Number of grandchildren under age 16                 | 0.01     | (-0.003, 0.02) |
| Doesn't know how many grandchildren under age 16     | 0.15**   | (0.05, 0.25)   |
| <i>Demographics</i>                                  |          |                |
| Female                                               | -0.07*   | (-0.14, -0.01) |
| Age                                                  | -0.02*** | (-0.03, -0.02) |
| Marital status (Ref: Married or living with partner) |          |                |
| Never married                                        | 0.05     | (-0.13, 0.23)  |
| Separated or divorced                                | -0.04    | (-0.14, 0.05)  |
| Widowed                                              | -0.14*** | (-0.21, -0.06) |
| <i>Socioeconomic Indicators</i>                      |          |                |
| Education (Ref: No formal)                           |          |                |
| Primary                                              | 0.37***  | (-0.31, 0.44)  |
| Secondary                                            | 0.62***  | (0.53, 0.72)   |
| Employment status (Ref: Not working)                 |          |                |
| Employed                                             | -0.02    | (-0.12, 0.08)  |
| Home manager                                         | -0.10*   | (-0.19, -0.01) |
| Retired                                              | -0.08*   | (-0.16, -0.01) |
| Individual earnings and transfers                    | -0.03    | (-0.07, 0.01)  |
| <i>Household and Caregiving Characteristics</i>      |          |                |
| Household wealth index                               | 0.05***  | (0.03, 0.07)   |
| Provides care to adult in household                  | -0.10    | (-0.24, 0.05)  |
| Number of people in household                        | -0.03+   | (-0.07, 0.004) |
| Interview month                                      | 0.02***  | (0.01, 0.03)   |
| R <sup>2</sup>                                       | 0.31     |                |
| F                                                    | 59.82*** |                |
| N                                                    | 3,668    |                |

two-tailed tests, + p<.10, \* p<.05, \*\*P<.01, \*\*\* p<.001  
n=1660 (45%) are aged 65+
